# Supplementary material for: Honey bee (Apis mellifera) larval pheromones may regulate gene expression related to foraging task specialization
Source: PubMed Central journal article supplement (PMC6642498; doi:10.1186/s12864-019-5923-7), 2019-07-19

# Cluster dendrogram with AU/BP values (%)

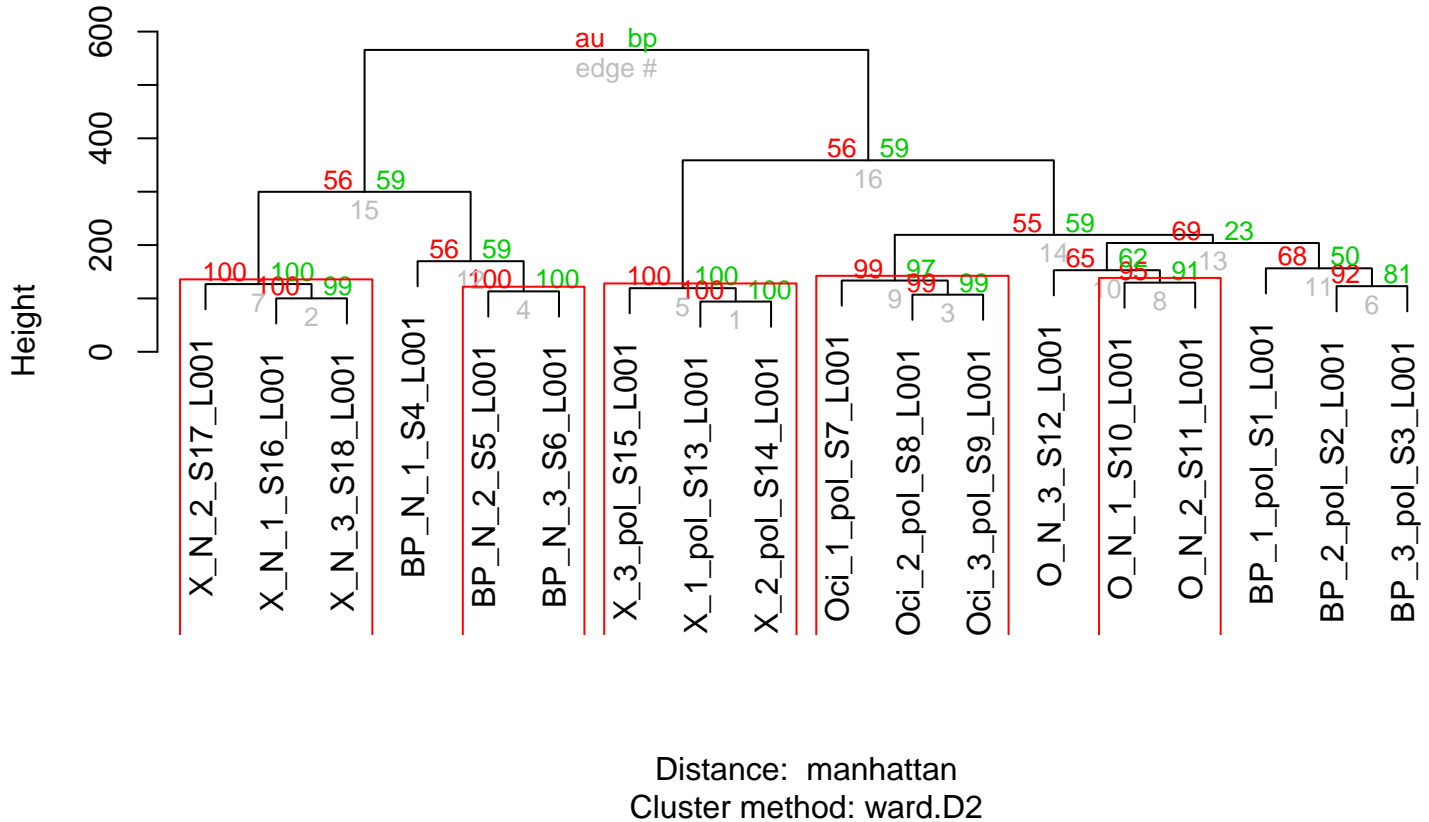

Supplement: 12864_2019_5923_MOESM4_ESM.pdf [file 12864_2019_5923_MOESM4_ESM.pdf]
